# Supplementary material for: A broadly-neutralizing antibody against Ebolavirus glycoprotein that potentiates the breadth and neutralization potency of other antibodies
Source: PubMed Central journal article supplement (PMC11230233; doi:10.1101/2024.06.21.600001), 2024-06-25
Supplement: media-1.pdf [file media-1.pdf]

Figure S1.

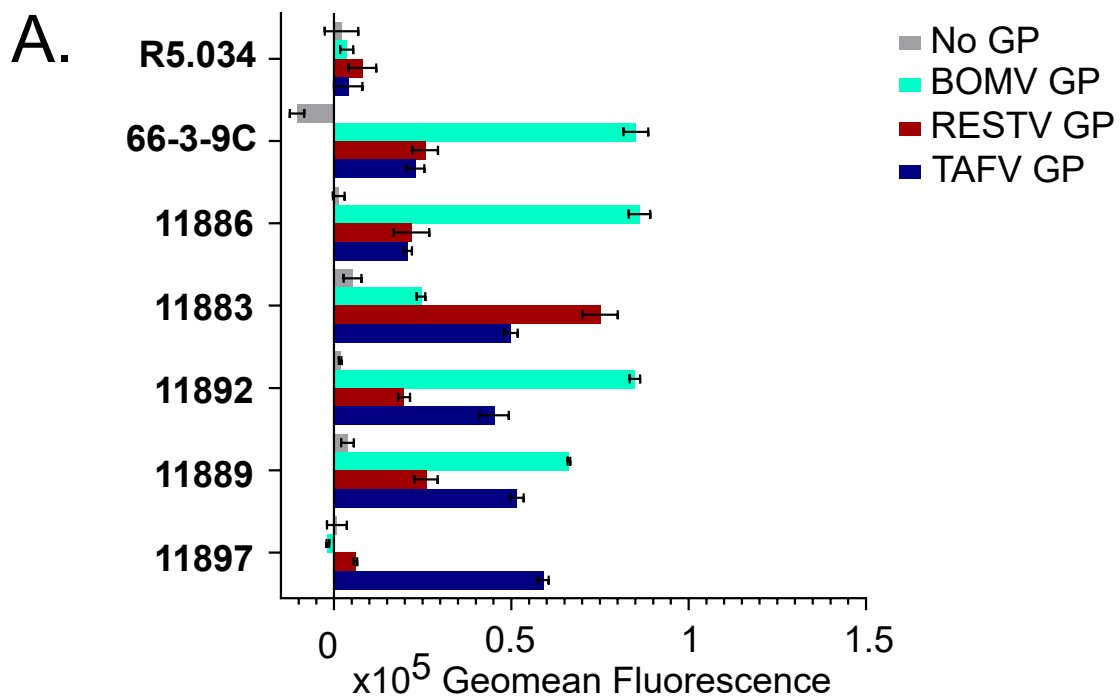

**B.** *In vitro* neutralization of RESTV GP coated S-FLU virus

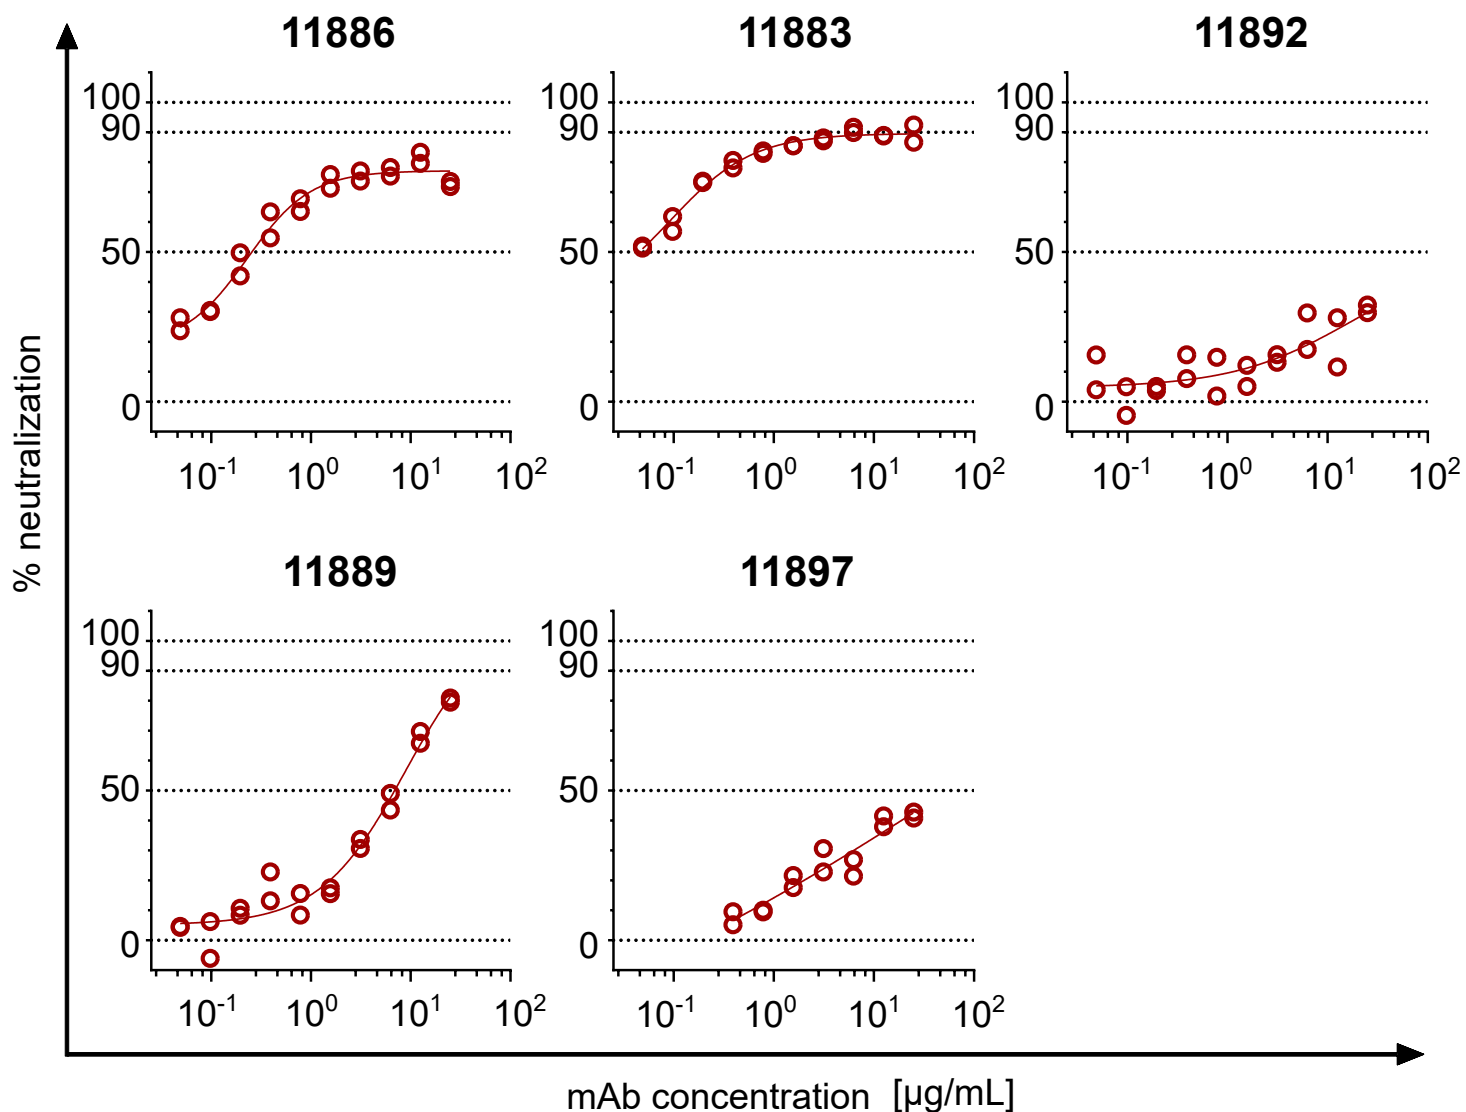

Figure S2.

A.

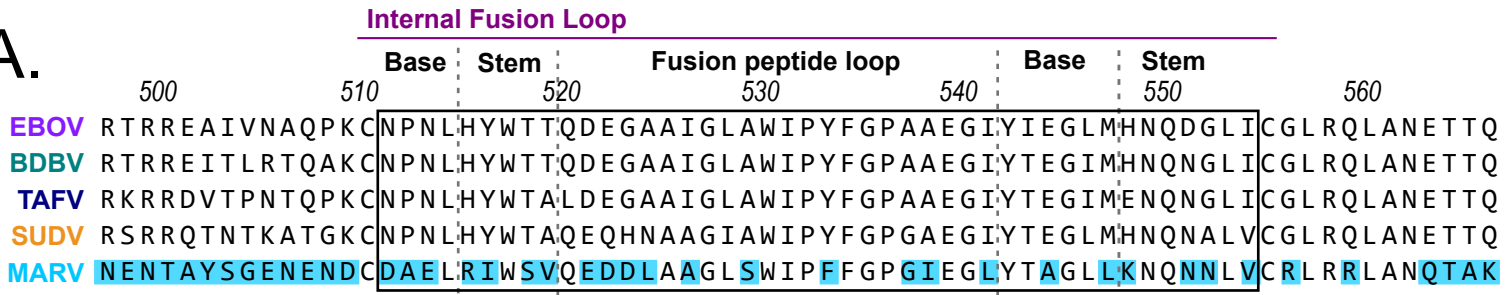

B.i.

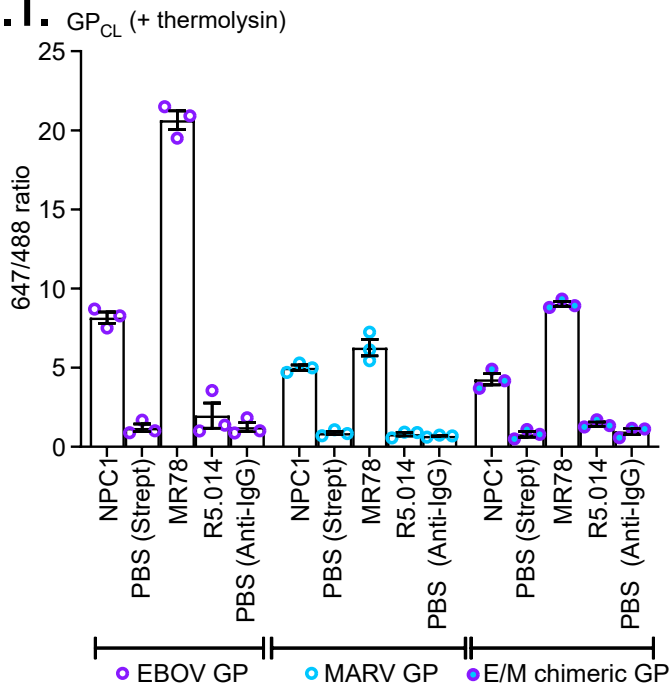

ii.

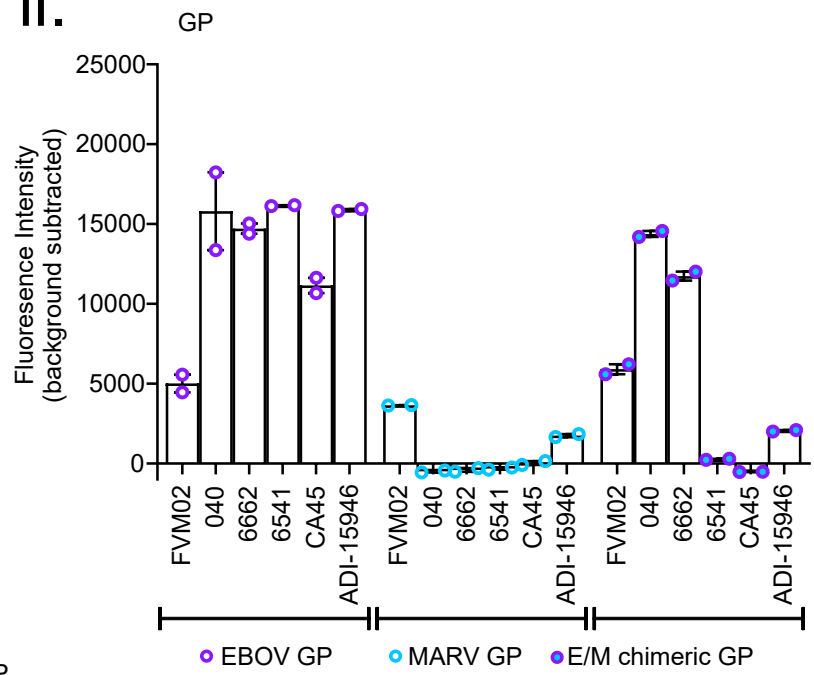

C.

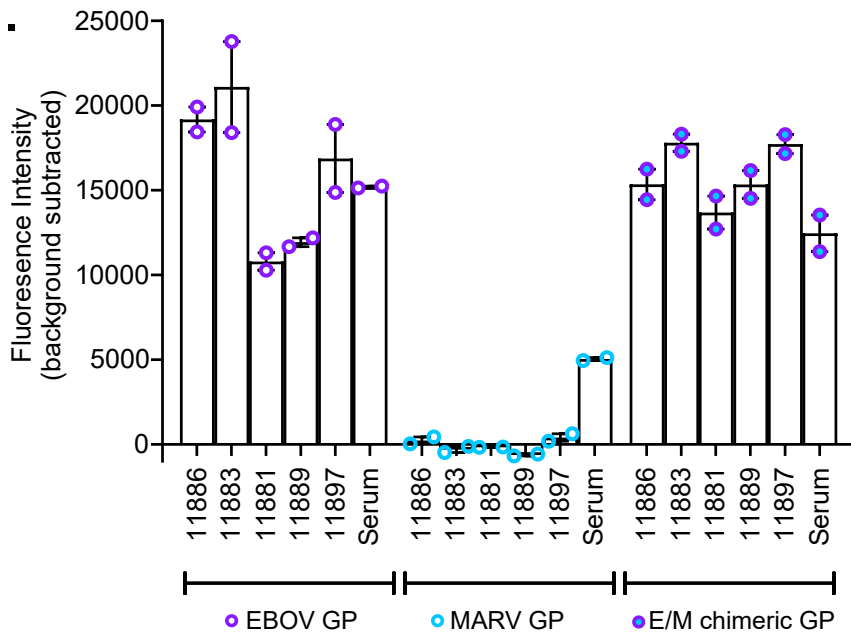

Figure S3.

A.

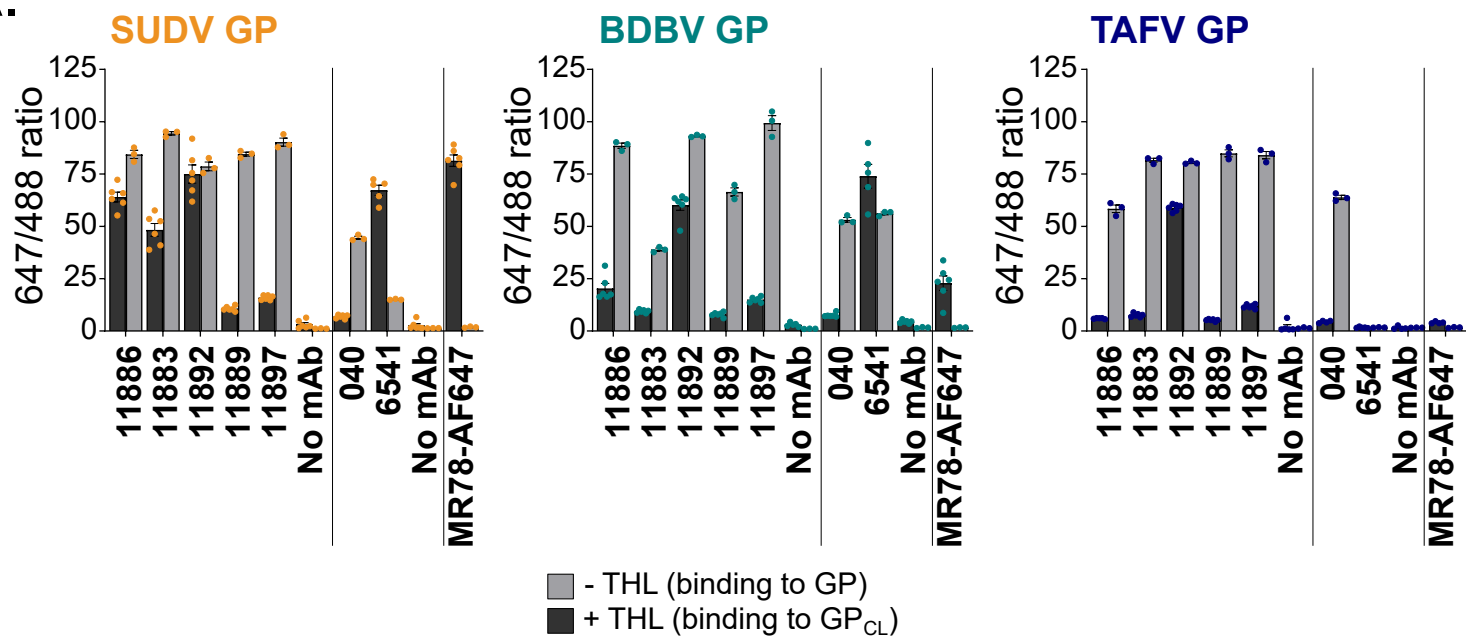

B.

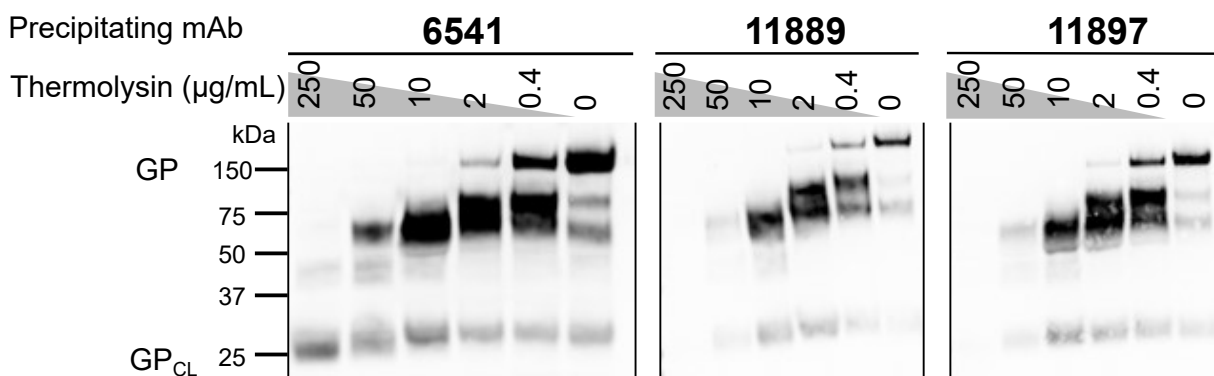



Figure S5.

— mAb alone      — mAb + held 11886      — Predicted Bliss Additivity      - - - Held 11886

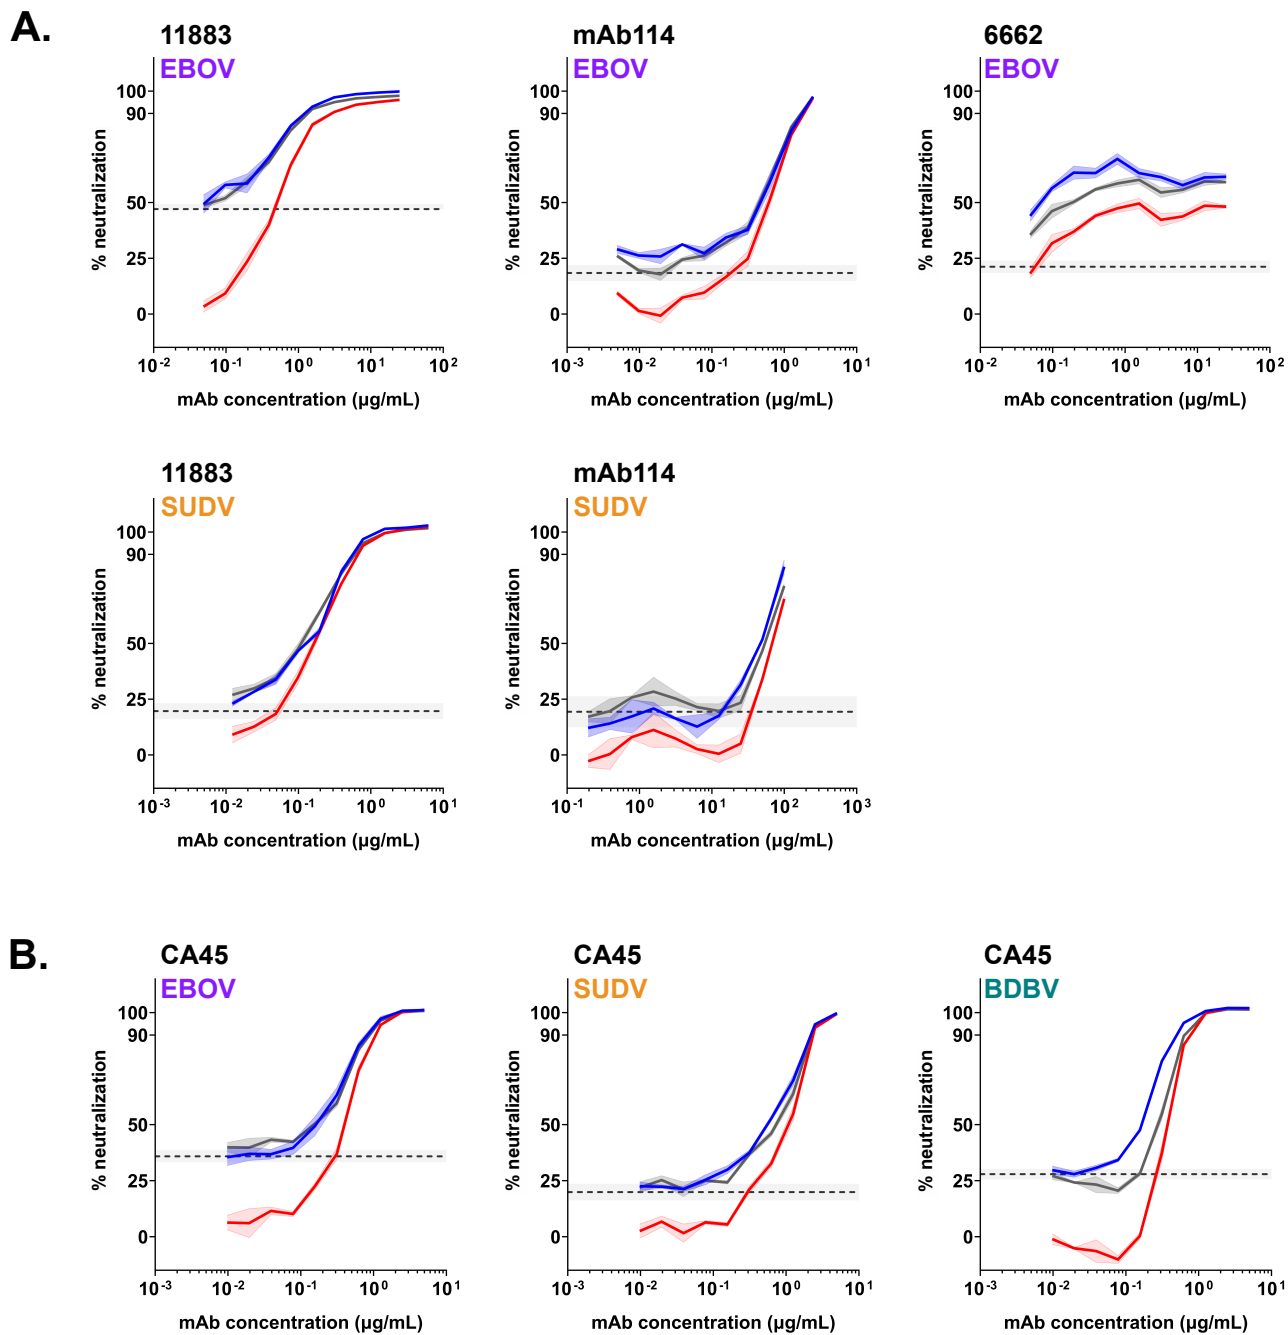

Figure S6.

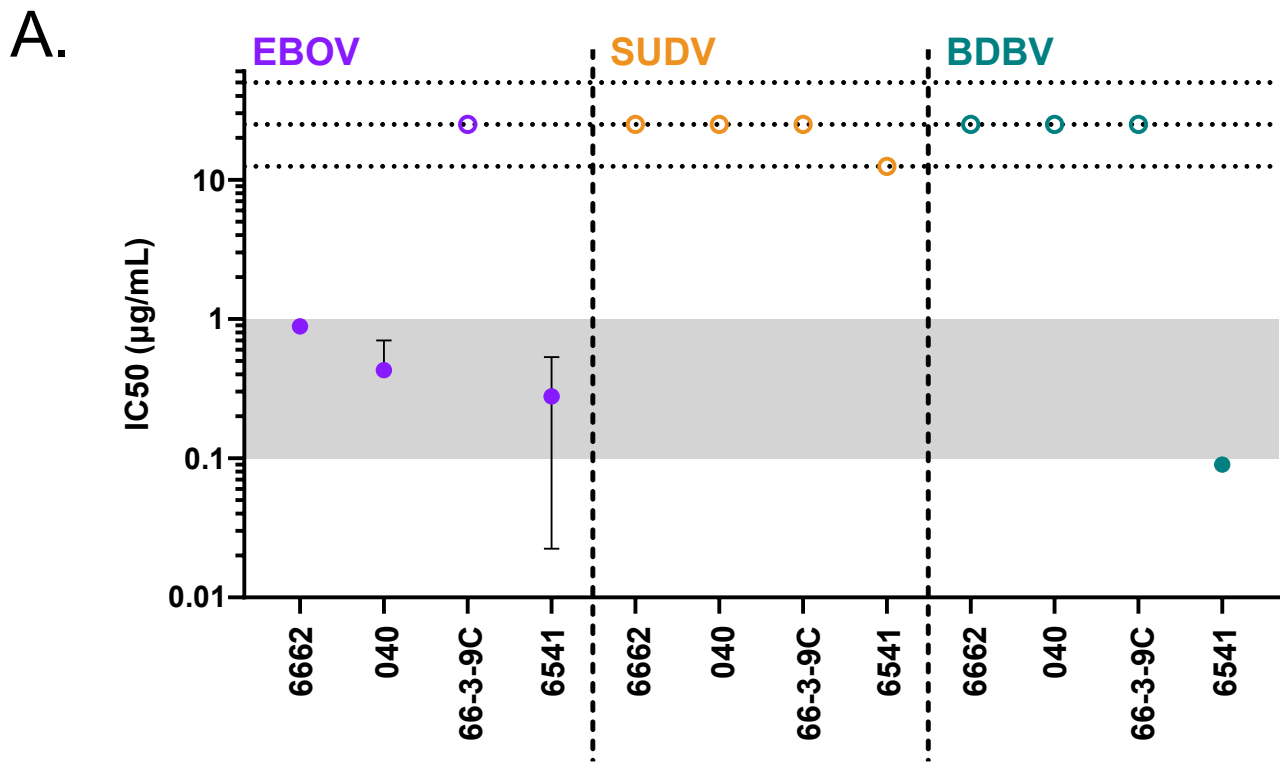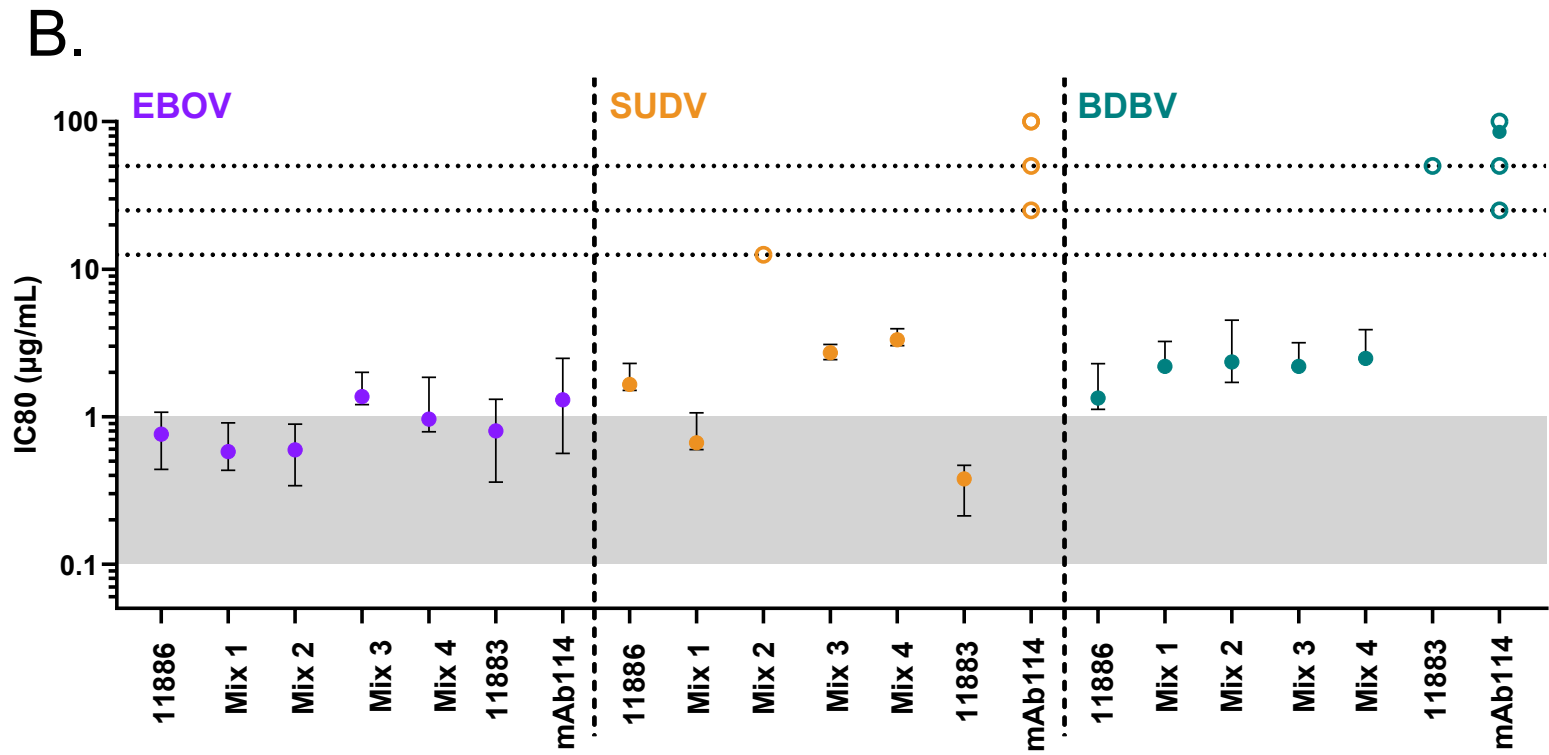

|       |                              |
|-------|------------------------------|
| Mix 1 | 11883 + 66-3-9C + 11886      |
| Mix 2 | 6662 + 040 + 66-3-9C + 6541  |
| Mix 3 | mAb114 + 66-3-9C + 11886     |
| Mix 4 | 6662 + 040 + 66-3-9C + 11886 |
